# Supplementary material for: The complex interactions of Chs5p, the ChAPs, and the cargo Chs3p
Source: PubMed Central journal article supplement — Mol Biol Cell. 2012 Nov 15;23(22):4402–15. doi: 10.1091/mbc.E11-12-1015 (PMC3496614; doi:10.1091/mbc.e11-12-1015), 2012-11-15
Supplement: supp_E11-12-1015v1_CombinedSupMats.pdf [file supp_E11-12-1015v1_CombinedSupMats.pdf]

### Figure S1

The tetratricopeptide repeats of the ChAPs family are located in conserved regions

(A) BLASTP alignment of *S. cerevisiae* Chs6p against ChAPs proteins in other fungi. Colours display the degree of conservation, as indicated by the scale below. Several regions appeared highly conserved, including TPR3-4 and TPR5 but also other parts such as stretch of about 114 amino acids at the N-terminus whose function is unknown. (B) Sequence alignment of the *S. cerevisiae* ChAPs. Dark grey bars indicate the degree of sequence conservation, red boxes the approximate position of the tetratricopeptide repeats.

### Figure S2

TPR1-4 is required for co-precipitation of Chs6p with Bud7p

Co-immunoprecipitation was performed as in Figure 5. Interaction of Chs6( $\Delta$ TPR1-4) with Bud7p was entirely abolished, while Chs6( $\Delta$ TPR5) only showed a mild reduction in binding, suggesting that TPR1-4 is generally required for co-precipitation of the ChAPs family members. Two different exposures were cropped together because of the strong signal of the precipitated myc-tagged constructs.

### Figure S3

Chs6p requires an intact TPR fold for function

(A) Primary sequence of TPR5 in Chs6p. Residues, which were considered part of the conserved TPR backbone are highlighted in red. Chs6p bearing a double point mutation in two neighboring TPR backbone residues (L619G/G620W) was non-functional, as judged by mis-localization of Chs3p (B) and calcofluor resistance (C). Scale bar: 5  $\mu$ m (D) Cargo interaction and Chs5p binding by Chs6p can be decoupled. Deletion of TPR1-4 or the last 13 amino acids in Chs6p abolishes Chs5p binding but does not influence the binding of Chs6( $\Delta$ TPR1-4) and Chs6( $\Delta$ C13) to Chs3p. Cargo interaction was assessed by

precipitating Chs3p from DSP-cross linked lysates with anti-Chs3p antibodies and probing precipitates for different Chs6p constructs

**Figure S4**

Bch2p-Chs6p chromosomally generated chimera constructs used in the study. Numbers in brackets indicate amino acid sequences of Chs6p and Bch2p domains in each construct. In bold italic: Chs6p domains replaced with corresponding domains of Bch2p.

**A**

TPR 1-4      TPR5

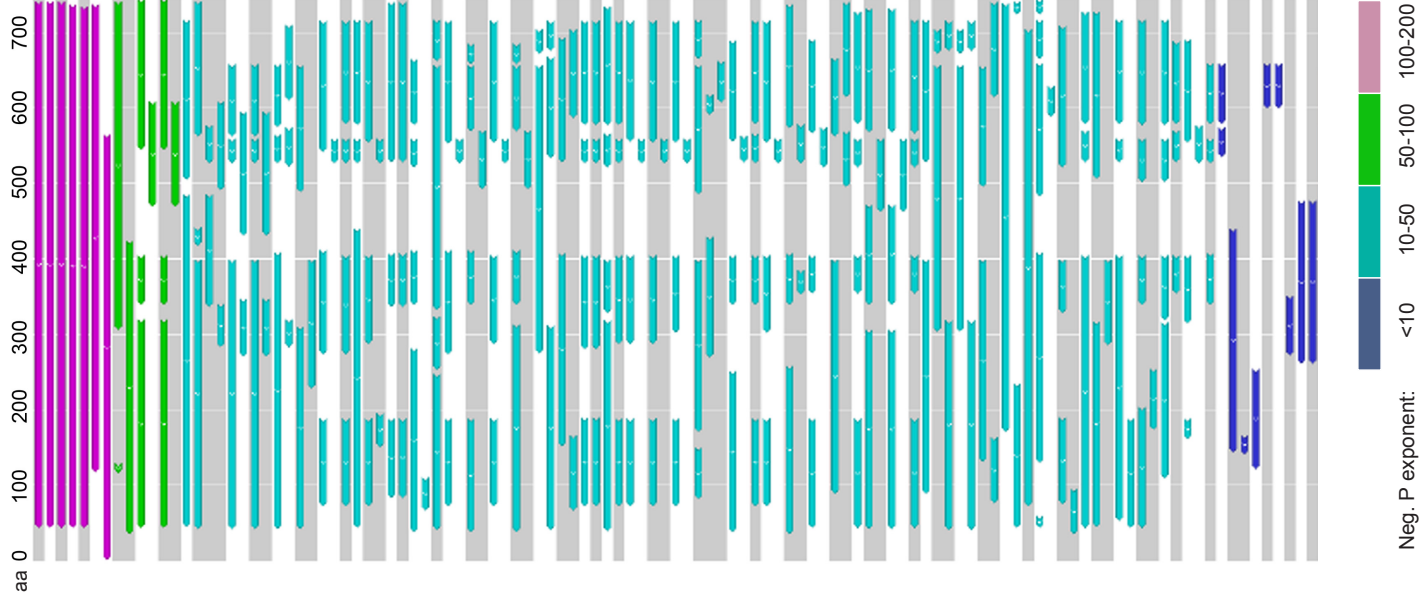

**B**

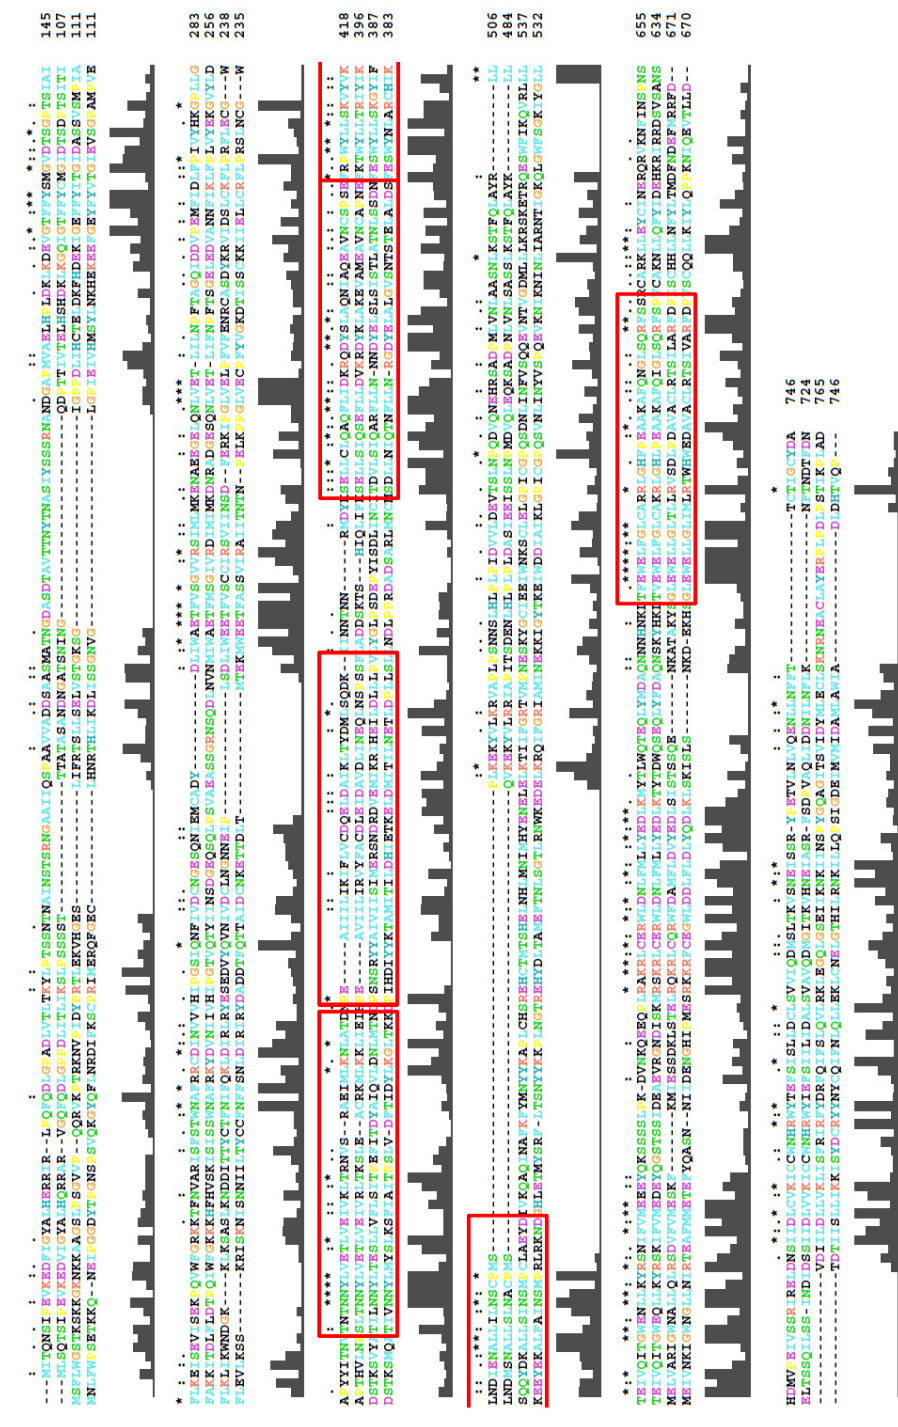

Neg. P exponent: <10    10-50    50-100    100-200

# Rockenbauch et al., Figure S2

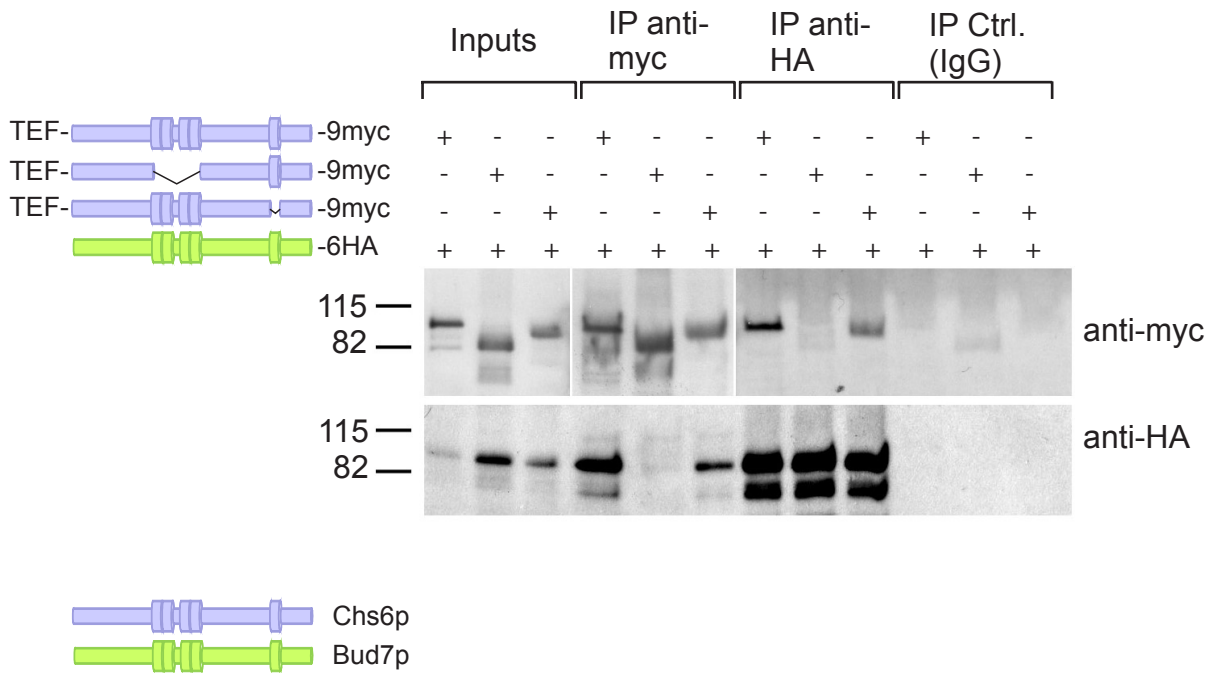

Rockenbauch et al., Figure S3

**A**

613 GLEWELGLIMLRTWHWEDAVACLRTSIVARFDP 646

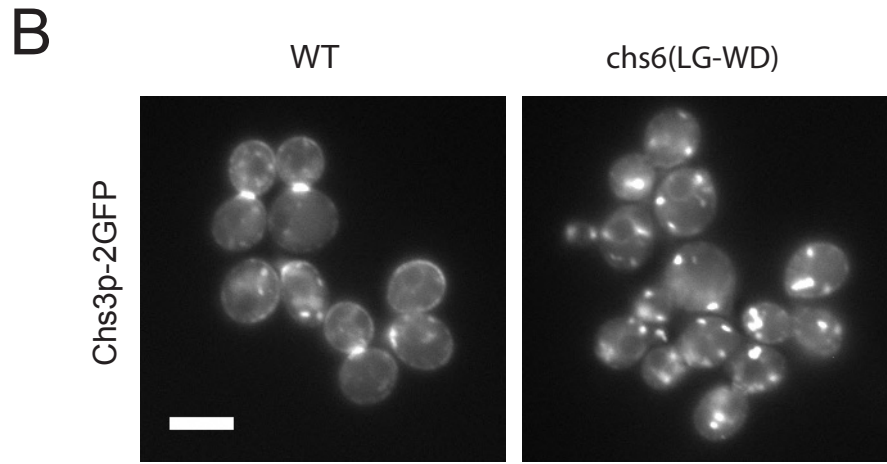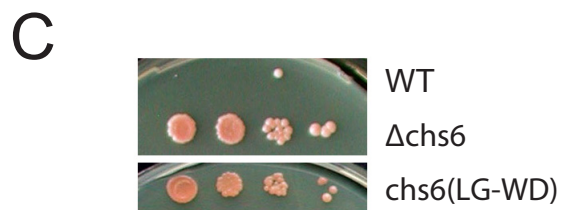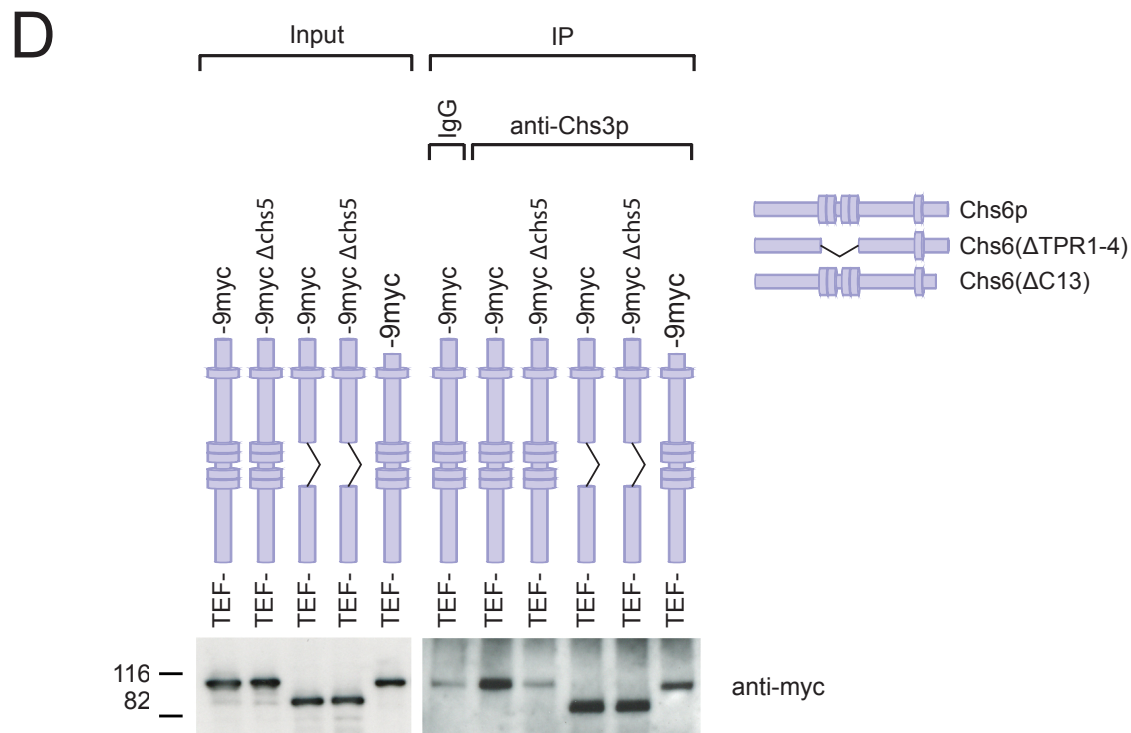

# Rockenbauch et al., Figure S4

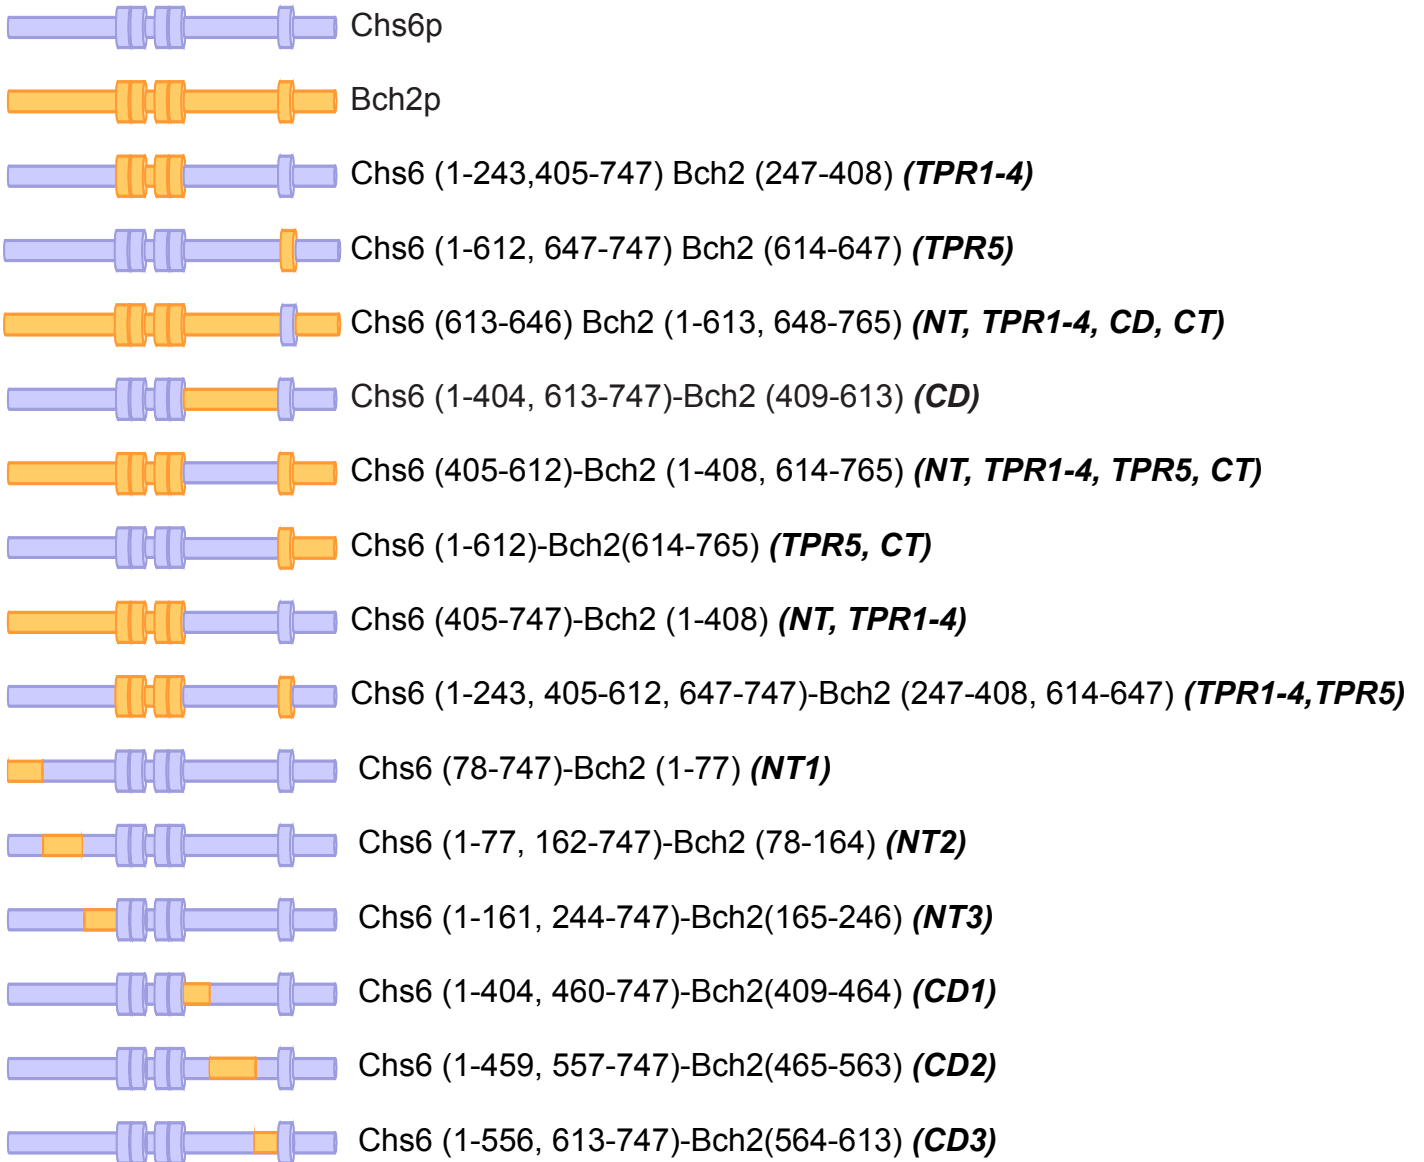

Supplementary Table 1. Strains used in this study

| Name      | Genotype                                                                                                                                                         | Reference                 |
|-----------|------------------------------------------------------------------------------------------------------------------------------------------------------------------|---------------------------|
| YPH499    | <i>MAT a ade2 his3 leu2 lys2 trp1 ura3</i>                                                                                                                       | Sikorski and Hieter, 1989 |
| YAS328    | <i>MAT a ade2 his3 leu2 lys2 trp1 ura3 CHS6::CHS6-9myc (KI TRP1)</i>                                                                                             | Trautwein et al., 2006    |
| YAS2413   | <i>MAT a ade2 his3 leu2 lys2 trp1 ura3 CHS3::CHS3-2GFP (KI TRP1) CHS6::CHS6(Δ730-1212)-9myc (HIS3MX6)</i>                                                        | This study                |
| YAS2414   | <i>MAT a ade2 his3 leu2 lys2 trp1 ura3 CHS3::CHS3-2GFP (KI TRP1) CHS6::CHS6(Δ1837-1938)-9myc (HIS3MX6)</i>                                                       | This study                |
| YAS2506   | <i>MAT a ade2 his3 leu2 lys2 trp1 ura3 CHS6::TEF(natNT2)-CHS6-9myc (KI TRP1)</i>                                                                                 | This study                |
| YAS3206   | <i>MAT a ade2 his3 leu2 lys2 trp1 ura3 CHS3::CHS3-2GFP (KI TRP1) CHS6::TEF(natNT2)-CHS6-9myc (HIS3MX6)</i>                                                       | This study                |
| YAS3290   | <i>MAT a ade2 his3 leu2 lys2 trp1 ura3 CHS3::CHS3-2GFP (KI TRP1) CHS6::TEF(natNT2)-CHS6-9myc (HIS3MX6) CHS5::LEU2</i>                                            | This study                |
| YAS2475   | <i>MAT a ade2 his3 leu2 lys2 trp1 ura3 CHS3::CHS3-2GFP (KI TRP1) CHS6::TEF(natNT2)-CHS6(Δ730-1212)-9myc (HIS3MX6)</i>                                            | This study                |
| YAS2712   | <i>MAT a ade2 his3 leu2 lys2 trp1 ura3 CHS3::CHS3-2GFP (KI TRP1) CHS6::TEF(natNT2)-CHS6(Δ730-1212)-9myc (HIS3MX6) CHS5::LEU2</i>                                 | This study                |
| YAS2476   | <i>MAT a ade2 his3 leu2 lys2 trp1 ura3 CHS3::CHS3-2GFP (KI TRP1) CHS6::TEF(natNT2)-CHS6(Δ1837-1938)-9myc (HIS3MX6)</i>                                           | This study                |
| YAS563-2a | <i>MAT a ade2 his3 leu2 lys2 trp1 ura3 CHS6::URA3</i>                                                                                                            | Trautwein et al., 2006    |
| YAS2855   | <i>MAT a/a ade2/ade2 his3/his3 leu2/leu2 lys2/lys2 trp1/trp1 ura3/ura3 CHS3::CHS3-2GFP (KI TRP1) CHS6::CHS6(Δ730-1212)-9myc (HIS3MX6) CHS6::CHS6(Δ1837-1938)</i> | This study                |
| YAS563-4A | <i>MAT a ade2 his3 leu2 lys2 trp1 ura3 BCH2::KAN (Tn903)</i>                                                                                                     | Trautwein et al., 2006    |
| YAS525    | <i>MAT a ade2 his3 leu2 lys2 trp1 ura3 CHS6::URA3 BCH2::KAN (Tn903)</i>                                                                                          | Trautwein et al., 2006    |
| YAS2938   | <i>MAT a ade2 his3 leu2 lys2 trp1 ura3 CHS6::LEU2 BCH2::BCH2(Δ739-1224)</i>                                                                                      | This study                |
| YAS2939   | <i>MAT a ade2 his3 leu2 lys2 trp1 ura3 CHS6::LEU2 BCH2::BCH2(Δ1840-1941)</i>                                                                                     | This study                |
| YAS563-5a | <i>MAT a ade2 his3 leu2 lys2 trp1 ura3 BCH1::HIS5 (S, pombe)</i>                                                                                                 | Trautwein et al., 2006    |
| YAS2852   | <i>MAT a ade2 his3 leu2 lys2 trp1 ura3 BCH1::BCH1(Δ793-1251)</i>                                                                                                 | This study                |
| YAS2853   | <i>MAT a ade2 his3 leu2 lys2 trp1 ura3 BCH1::BCH1(Δ1723-1824)</i>                                                                                                | This study                |
| YAS2923   | <i>MAT a ade2 his3 leu2 lys2 trp1 ura3 CHS6::CHS6-3GFP (KI TRP1) SEC7-dsRed (LEU2)</i>                                                                           | This study                |
| YAS2924   | <i>MAT a ade2 his3 leu2 lys2 trp1 ura3 CHS3::CHS3 (URA3)* CHS6::CHS6(Δ730-1212)-3GFP (KI TRP1) SEC7-dsRed (LEU2)</i>                                             | This study                |
| YAS2925   | <i>MAT a ade2 his3 leu2 lys2 trp1 ura3 CHS3::CHS3 (URA3)* CHS6::MET25(natNT2)-CHS6(Δ1837-1938)-3GFP (KI TRP1) SEC7-dsRed (LEU2)</i>                              | This study                |
| YAS2700   | <i>MAT a ade2 his3 leu2 lys2 trp1 ura3 SEC7-dsRed (LEU2)</i>                                                                                                     | This study                |
| YAS2561   | <i>MAT a ade2 his3 leu2 lys2 trp1 ura3 CHS6::TEF(natNT2)-CHS6-9myc (URA3) BCH1::BCH1-6HA (KanMX4)</i>                                                            | This study                |
| YAS2570   | <i>MAT a ade2 his3 leu2 lys2 trp1 ura3 CHS3::CHS3-2GFP (KI TRP1) CHS6::CHS6(Δ730-1212)-9myc (HIS3MX6) BCH1::BCH1-6HA (KanMX4)</i>                                | This study                |
| YAS2508   | <i>MAT a ade2 his3 leu2 lys2 trp1 ura3 CHS3::CHS3-2GFP (KI TRP1) CHS6::CHS6(Δ1837-1938)-9myc (HIS3MX6) BCH1::BCH1-6HA (KanMX4)</i>                               | This study                |
| YAS2854   | <i>MAT a ade2 his3 leu2 lys2 trp1 ura3 CHS3::CHS3-2GFP (KI TRP1) CHS6::TEF(natNT2)-CHS6(L619W/G620D)-9myc (HIS3MX6)</i>                                          | This study                |
| YAS2851   | <i>MAT a ade2 his3 leu2 lys2 trp1 ura3 CHS3::CHS3-2GFP (KI TRP1) CHS6::CHS6-BCH2(739-1224)</i>                                                                   | This study                |
| YAS2850   | <i>MAT a ade2 his3 leu2 lys2 trp1 ura3 CHS3::CHS3-2GFP (KI TRP1) CHS6::CHS6-BCH2(1840-1941)</i>                                                                  | This study                |
| YAS3083   | <i>MAT a ade2 his3 leu2 lys2 trp1 ura3 CHS3::CHS3-2GFP (KI TRP1) CHS6::LEU2 BCH2::BCH2-CHS6(1837-1938)</i>                                                       | This study                |
| YAS2927   | <i>MAT a ade2 his3 leu2 lys2 trp1 ura3 CHS3::CHS3-2GFP (KI TRP1) CHS6::CHS6-BCH2(1225-1839)-9myc (HIS3MX6)</i>                                                   | This study                |
| YAS3084   | <i>MAT a ade2 his3 leu2 lys2 trp1 ura3 CHS3::CHS3-2GFP (KI TRP1) BCH2::BCH2-CHS6(1213-1836)-9myc (HIS3MX6) CHS6::LEU2</i>                                        | This study                |
| YAS3021   | <i>MAT a ade2 his3 leu2 lys2 trp1 ura3 CHS3::CHS3-2GFP (KI TRP1) BCH2::CHS6 CHS6::LEU2</i>                                                                       | This study                |
| YAS3019   | <i>MAT a ade2 his3 leu2 lys2 trp1 ura3 CHS3::CHS3-2GFP (KI TRP1) BCH2::BCH2-CHS6(1-1836)-9myc (HIS3MX6) CHS6::LEU2</i>                                           | This study                |
| YAS3085   | <i>MAT a ade2 his3 leu2 lys2 trp1 ura3 CHS3::CHS3-2GFP (KI TRP1) BCH2::BCH2-CHS6(1213-2241)-9myc (HIS3MX6) CHS6::LEU2</i>                                        | This study                |
| YAS3087   | <i>MAT a ade2 his3 leu2 lys2 trp1 ura3 CHS3::CHS3-2GFP (KI TRP1) BCH2::BCH2-CHS6(1-729, 1213-1836, 1939-2241) CHS6::LEU2</i>                                     | This study                |
| YAS3265   | <i>MAT a ade2 his3 leu2 lys2 trp1 ura3 CHS3::CHS3-2GFP (KI TRP1) CHS6::CHS6(232-2241)-BCH2(1-231)-9myc (KanMx4) CHS6::LEU2</i>                                   | This study                |
| YAS3266   | <i>MAT a ade2 his3 leu2 lys2 trp1 ura3 CHS3::CHS3-2GFP (KI TRP1) CHS6::TEF(natNT2)-CHS6(1-231, 484-2241)-BCH2(231-492)-9myc (KanMx4) CHS6::LEU2</i>              | This study                |
| YAS3267   | <i>MAT a ade2 his3 leu2 lys2 trp1 ura3 CHS3::CHS3-2GFP (KI TRP1) CHS6::TEF(natNT2)-CHS6(1-483, 730-2241)-BCH2(493-738)-9myc (KanMx4) CHS6::LEU2</i>              | This study                |
| YAS3270   | <i>MAT a ade2 his3 leu2 lys2 trp1 ura3 CHS3::CHS3-2GFP (KI TRP1) CHS6::GPD(natNT2)-CHS6(1-1377, 1669-2241)-BCH2(1225-1392)-9myc (KanMx4) CHS6::LEU2</i>          | This study                |
| YAS3271   | <i>MAT a ade2 his3 leu2 lys2 trp1 ura3 CHS3::CHS3-2GFP (KI TRP1) CHS6::TEF(natNT2)-CHS6(1-1377, 1669-2241)-BCH2(1393-1689)-9myc (KanMx4) CHS6::LEU2</i>          | This study                |
| YAS3272   | <i>MAT a ade2 his3 leu2 lys2 trp1 ura3 CHS3::CHS3-2GFP (KI TRP1) CHS6::CHS6(1-1668, 1837-2241)-BCH2(1690-1839)-9myc (KanMx4) CHS6::LEU2</i>                      | This study                |
| YAS3091   | <i>MAT a ade2 his3 leu2 lys2 trp1 ura3 CHS3::CHS3(Δ3433-3498)-3GFP (KI TRP1) SEC7-dsRed (LEU2)</i>                                                               | This study                |
| YAS3093   | <i>MAT a ade2 his3 leu2 lys2 trp1 ura3 CHS3::CHS3(Δ3385-3498)-3GFP (KI TRP1) SEC7-dsRed (LEU2)</i>                                                               | This study                |
| YAS1516   | <i>MAT a ade2 his3 leu2 lys2 trp1 ura3 CHS3::LEU2</i>                                                                                                            | This study                |
| YAS3077   | <i>MAT a ade2 his3 leu2 lys2 trp1 ura3 CHS6::TEF(natNT2)-CHS6-9myc (KI TRP1) CHS3::LEU2</i>                                                                      | This study                |
| YAS2632   | <i>MAT a ade2 his3 leu2 lys2 trp1 ura3 CHS6::TEF(natNT2)-CHS6-9myc (KI TRP1) CHS5::LEU2</i>                                                                      | This study                |
| YAS2562   | <i>MAT a ade2 his3 leu2 lys2 trp1 ura3 CHS6::TEF(natNT2)-CHS6-9myc (URA3) BUD7::BUD7-6HA (KanMX4)</i>                                                            | This study                |
| YAS2571   | <i>MAT a ade2 his3 leu2 lys2 trp1 ura3 CHS3::CHS3-2GFP (KI TRP1) CHS6::CHS6(Δ730-1212)-9myc (HIS3MX6) BUD7::BUD7-6HA (KanMX4)</i>                                | This study                |
| YAS2510   | <i>MAT a ade2 his3 leu2 lys2 trp1 ura3 CHS3::CHS3-2GFP (KI TRP1) CHS6::CHS6(Δ1837-1938)-9myc (HIS3MX6) BUD7::BUD7-6HA (KanMX4)</i>                               | This study                |
| YAS3257   | <i>MAT a ade2 his3 leu2 lys2 trp1 ura3 KEX2::KEX2-GFP(KI TRP1)</i>                                                                                               | This study                |
| YAS3286   | <i>MAT a ade2 his3 leu2 lys2 trp1 ura3 KEX2::KEX2-GFP(KI TRP1) SEC7-dsRed (LEU2)</i>                                                                             | This study                |
| YAS3258   | <i>MAT a ade2 his3 leu2 lys2 trp1 ura3 KEX2::KEX2(Δ2098-2442)-GFP(KI TRP1)</i>                                                                                   | This study                |
| YAS3288   | <i>MAT a ade2 his3 leu2 lys2 trp1 ura3 KEX2::KEX2(Δ2098-2442)-GFP(KI TRP1) SEC7-dsRed (LEU2)</i>                                                                 | This study                |
| YAS3274   | <i>MAT a ade2 his3 leu2 lys2 trp1 ura3 KEX2::KEX2(Δ2098-2442)-GFP(KI TRP1) END3::URA3</i>                                                                        | This study                |
| YAS3273   | <i>MAT a ade2 his3 leu2 lys2 trp1 ura3 KEX2::KEX2(Δ2098-2442)-GFP(KI TRP1) CHS5::URA3</i>                                                                        | This study                |
| YAS3259   | <i>MAT a ade2 his3 leu2 lys2 trp1 ura3 KEX2::KEX2(Δ2098-2442)-CHS3(3331-3495)-GFP(KI TRP1)</i>                                                                   | This study                |
| YAS3289   | <i>MAT a ade2 his3 leu2 lys2 trp1 ura3 KEX2::KEX2(Δ2098-2442)-CHS3(3331-3495)-GFP(KI TRP1) SEC7-dsRed (LEU2)</i>                                                 | This study                |
| YAS3276   | <i>MAT a ade2 his3 leu2 lys2 trp1 ura3 KEX2::KEX2(Δ2098-2442)-CHS3(3331-3495)-GFP(KI TRP1) END3::URA3</i>                                                        | This study                |
| YAS3275   | <i>MAT a ade2 his3 leu2 lys2 trp1 ura3 KEX2::KEX2(Δ2098-2442)-CHS3(3331-3495)-GFP(KI TRP1) CHS5::URA3</i>                                                        | This study                |

\* A 3xGFP-tag was inserted into the CHS3 locus and later replaced with a URA3 cassette, thus removing the tag and restoring WT Chs3p expression.
